# Supplementary material for: β-catenin and PI3Kδ inhibition expands precursor Th17 cells with heightened stemness and antitumor activity
Source: JCI journal article supplement (doi:10.1172/jci.insight.90547), 2017-04-19
Supplement: sd1 [file 1]

## Supplemental Figures and Figure Legends:

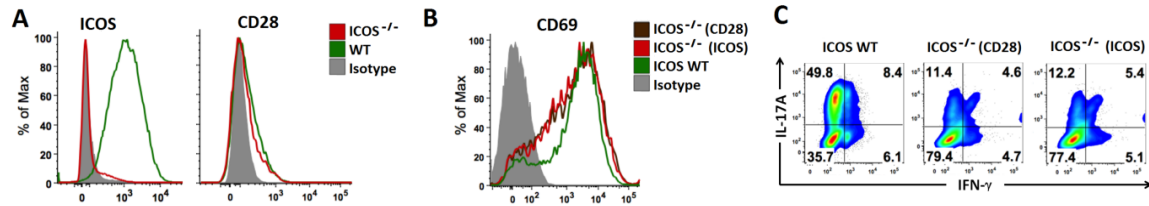

**Figure S1. ICOS deficient Th17 cells become activated *in vitro*, yet secrete less IL-17A.** A-B, ICOS<sup>-/-</sup>Th17 cells do not express ICOS, yet express CD28 and become activated. Activation status on WT and ICOS<sup>-/-</sup>Th17 cells was revealed by their high CD69 expression. Representative flow cytometry analysis of (A) ICOS and CD28 expression on ICOS<sup>-/-</sup> and wild-type (WT) CD4<sup>+</sup> T cells on day 0 and (B) CD69 on WT Th17 cells and ICOS<sup>-/-</sup> Th17 cells expanded with either ICOS or CD28 agonist on day 8 of culture. C, genetic ablation of ICOS diminishes Th17 function. (C) Representative flow analysis of IL-17A by IFN-γ secretion by WT Th17 cells and ICOS<sup>-/-</sup> Th17 cells expanded with either ICOS or CD28 agonist on day 8 of culture.

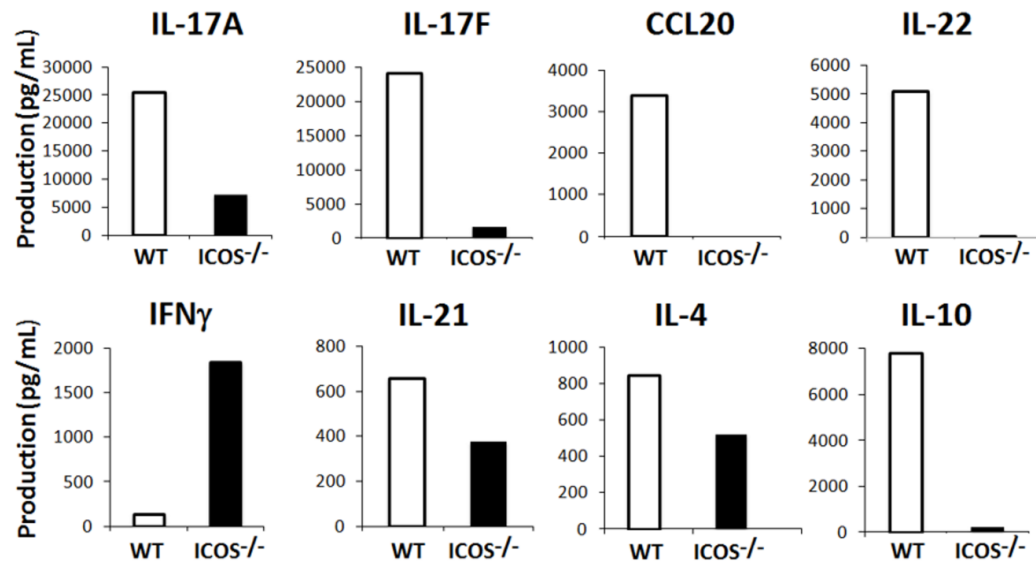

**Figure S2. Th17 cells deficient in ICOS produce less IL-17A, IL17F, CCL20, IL-22, IL-10, IL-21, IL-4 but more IFN $\gamma$ .** Representative ELISA analysis of cytokine production on day 3 of peptide activated TRP-1 ICOS<sup>-/-</sup> and WT Th17 cultures. The experiment was performed twice with similar results.

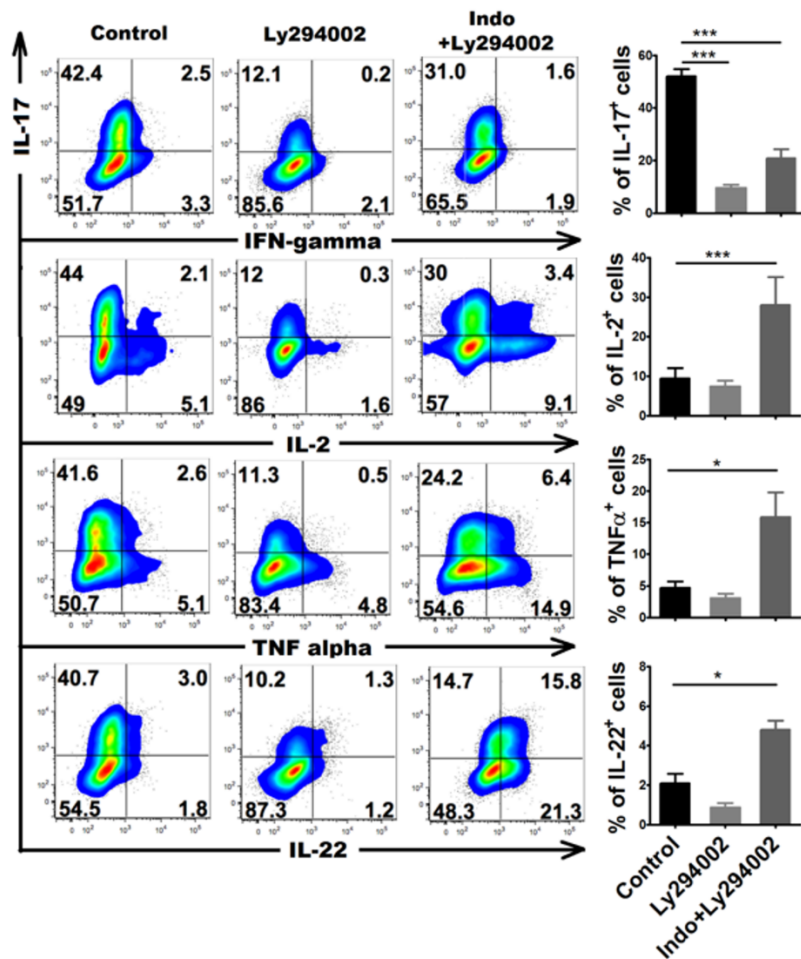

**Figure S3. Pharmacologic inhibition of pan PI3 Kinases activity and Wnt/ $\beta$ -catenin signaling pathway alter the cytokine profile of ICOS stimulated Th17 cells.** Inhibition of pan PI3 Kinases activity suppress IL-17A and IFN- $\gamma$  production, but concomitant inhibition of  $\beta$ -catenin increase IL-2, TNF- $\alpha$ , IL-22 secretion by ICOS activated Th17 cells. Representative FACS plot and quantification of cytokine production in CD4<sup>+</sup> cells polarized towards a Th17 phenotype, co-stimulated with ICOS agonist for 8 days (control) and expanded in the presence of total PI3K inhibitor (Ly294002, 10 $\mu$ M) and specific  $\beta$ -catenin inhibitor – Indomethacin (Indo, 60 $\mu$ M). Data represent mean  $\pm$  SEM of at least three independent experiments. \*,  $P < 0.05$ ; \*\*\*,  $P < 0.001$ .

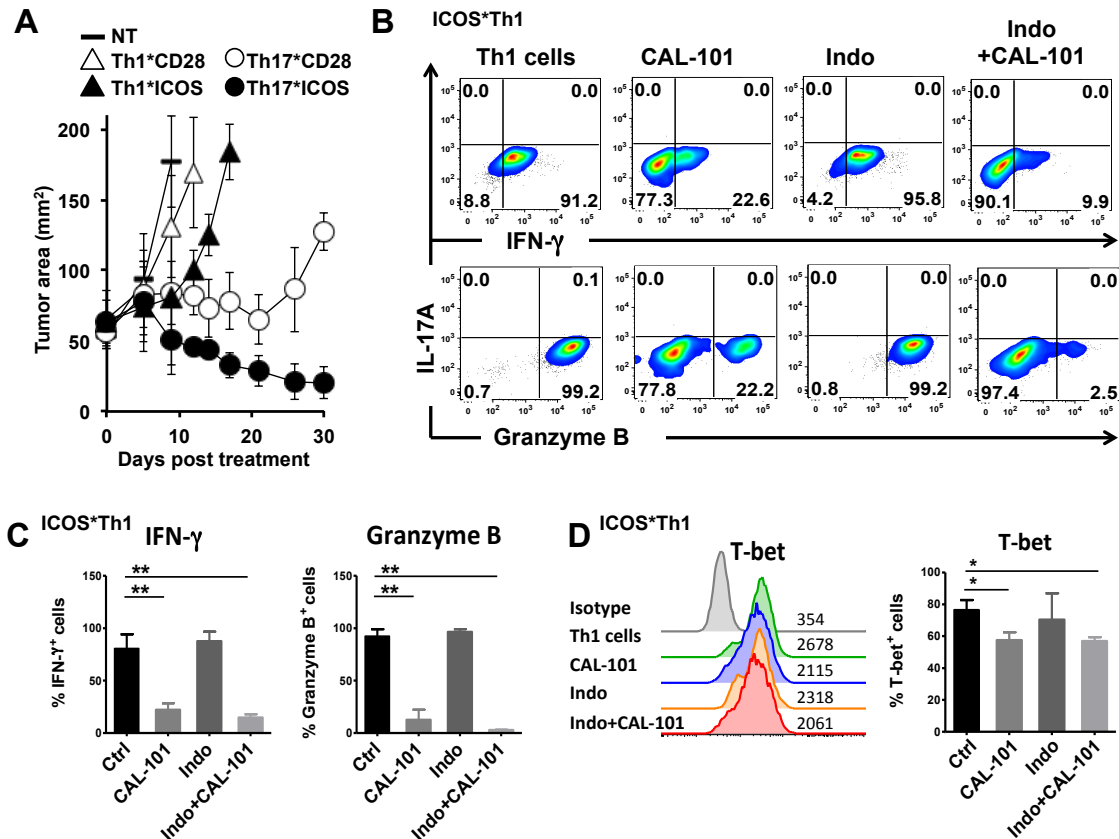

**Figure S4. PI3K/p110 $\delta$  and  $\beta$ -catenin co-inhibition reduces IFN- $\gamma$ , granzyme B and T-bet in ICOS-stimulated Th1 cells.** **A.** Th1 cells stimulated with ICOS are significantly more effective at slowing tumor growth than Th1 cells stimulated with CD28 ( $P < 0.05$ ). Th17 cells stimulated with ICOS are significantly more effective at regressing tumor than those stimulated with CD28 ( $P < 0.01$ ). Th17 cells stimulated with ICOS are significantly more effective at slowing tumor growth than Th1 cells stimulated with ICOS ( $P < 0.001$ ). **B.** Inhibition of p110 $\delta$  and/or  $\beta$ -catenin activity suppresses IL-IFN- $\gamma$  and Granzyme B by flow cytometry. **C.** Representative quantification of cytokine production in TRP-1 CD4<sup>+</sup> T cells polarized towards a Th1 phenotype, co-stimulated with ICOS agonist for 8 days (control) and expanded in the presence of p110 $\delta$  inhibitor (CAL-101, 10 $\mu$ M) and specific  $\beta$ -catenin inhibitor – Indomethacin (Indo, 60 $\mu$ M). **D.** Inhibition of p110 $\delta$  and/or  $\beta$ -catenin activity suppresses T-bet by flow cytometry and represented by quantification in CD4<sup>+</sup> T cells polarized towards a Th1 phenotype, co-stimulated with ICOS agonist for 8 days (control) and expanded in the presence of p110 $\delta$  inhibitor (CAL-101, 10 $\mu$ M) and specific  $\beta$ -catenin inhibitor–Indomethacin (Indo, 60 $\mu$ M). Data represent mean  $\pm$  SEM of at least three independent experiments. \*,  $P < 0.05$ ; \*\*,  $P < 0.01$ .

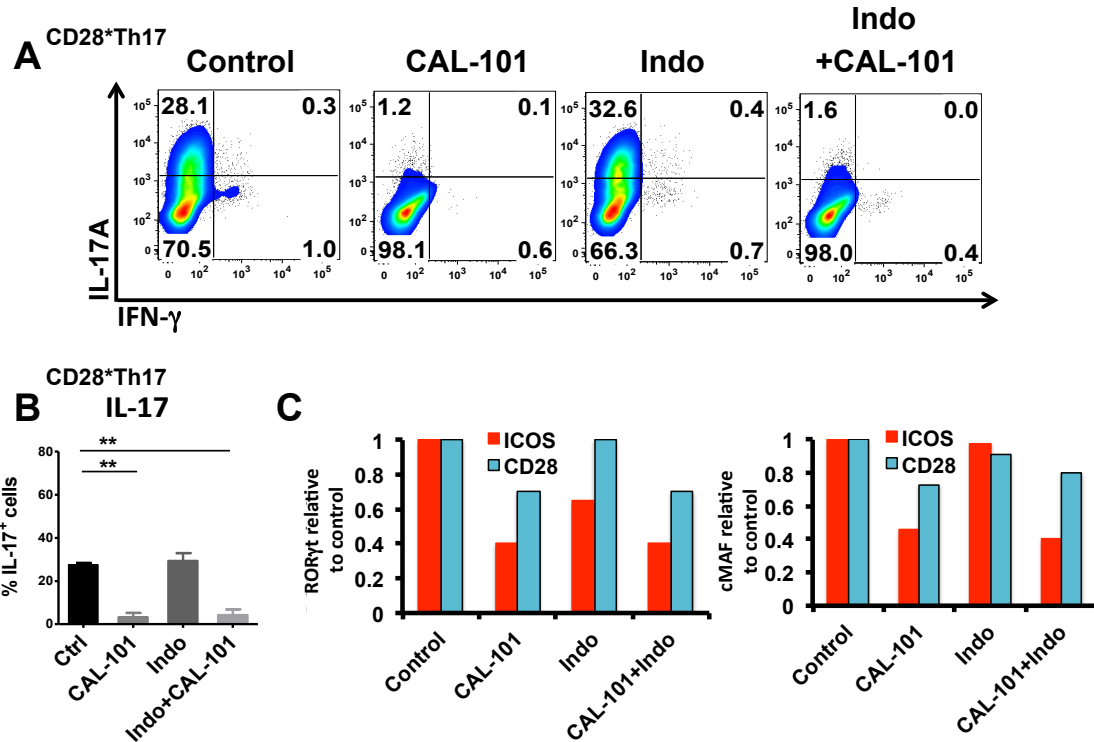

**Figure S5. p110 $\delta$  and  $\beta$ -catenin co-inhibition reduces IL-17A significantly yet slightly decreases ROR $\gamma$ t and cMaf in CD28-stimulated Th17 cells.** A-B. Inhibition of p110 $\delta$  and/or  $\beta$ -catenin suppresses IL-17A by flow cytometry and representative quantification of IL-17 production in CD4<sup>+</sup> T cells polarized towards a Th17 phenotype, co-stimulated with CD28 agonist for 8 days (control) and expanded in the presence of p110 $\delta$  inhibitor (CAL-101, 10 $\mu$ M) and specific  $\beta$ -catenin inhibitor – Indomethacin (Indo, 60 $\mu$ M). Data represent mean  $\pm$  SEM of at least three independent experiments. \*,  $P < 0.05$ ; \*\*,  $P < 0.01$ . C. Drugs suppress Th17 transcription in Th17 cells stimulated with ICOS compared to those stimulated with CD28. Th17 cells stimulated with CD28 relative to those stimulated with ICOS. CD4<sup>+</sup> TRP-1 cells polarized towards a Th17 phenotype, co-stimulated with CD28 or ICOS agonist for 8 days (control) and expanded in the presence of p110 $\delta$  inhibitor (CAL-101, 10 $\mu$ M) and specific  $\beta$ -catenin inhibitor – Indomethacin (Indo, 60 $\mu$ M).

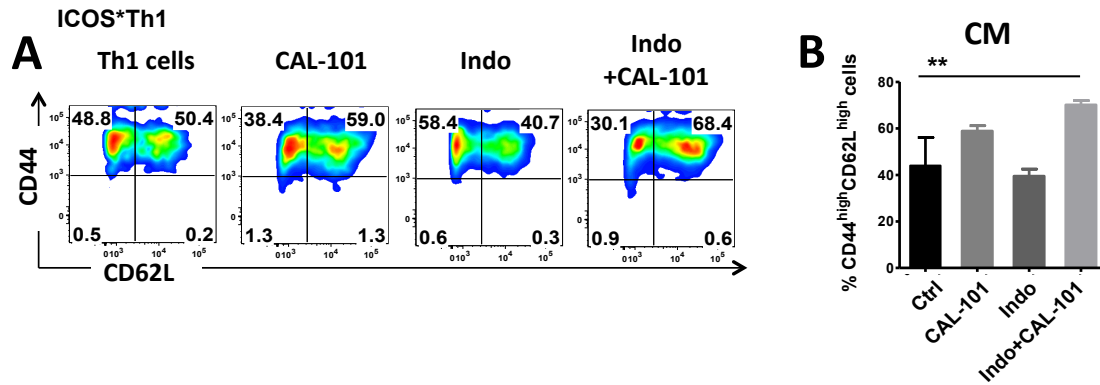

**Figure S6. CD62L is elevated in ICOS-stimulated Th1 cells co-inhibited of p110 $\delta$  and  $\beta$ -catenin, as shown by flow (A). B. Data represents mean  $\pm$  SEM of at least three independent experiments. \*\*,  $P < 0.01$ .**

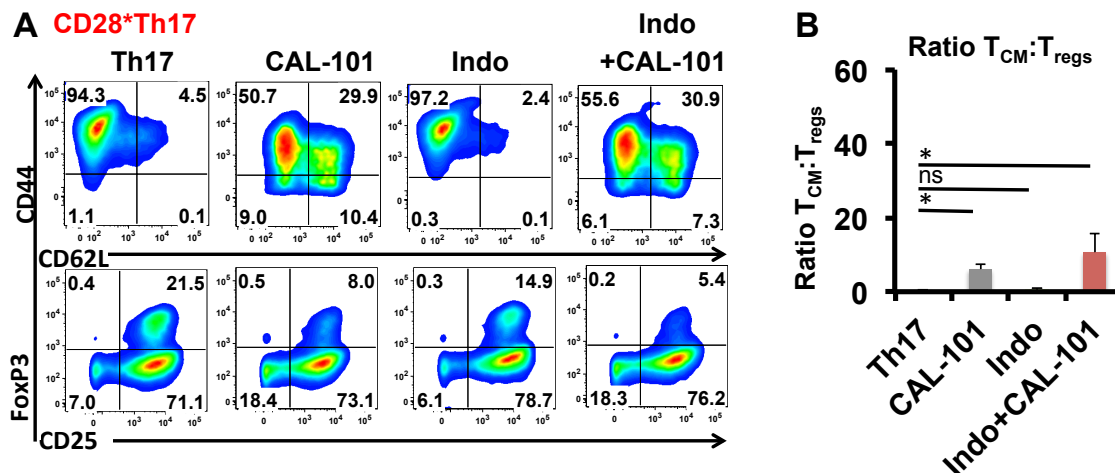

**Figure S7. CD62L is elevated while FoxP3 is decreased in CD28-stimulated Th17 cells co-inhibited of p110 $\delta$  and  $\beta$ -catenin, as shown by flow (A). B. Relative CD62L+ to FoxP3 Th17 cells represented as mean  $\pm$  SEM of three independent experiments. \*,  $P < 0.05$ .**

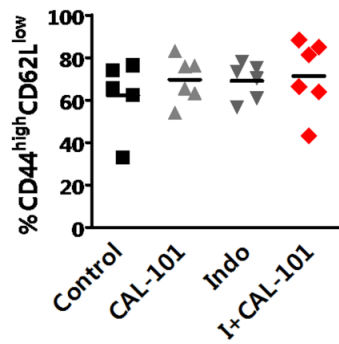

**Figure S8. Th17 cells stimulated with ICOS and primed with Indo and CAL-101 acquire an effector memory phenotype *in vivo*.** Quantification of donor V $\beta$ 14+ tumor-specific CD44<sup>high</sup>CD62L<sup>low</sup> effector memory cells in the spleen 14 days post ACT of ICOS activated Th17 cells primed with the inhibitors or untreated, as indicated.



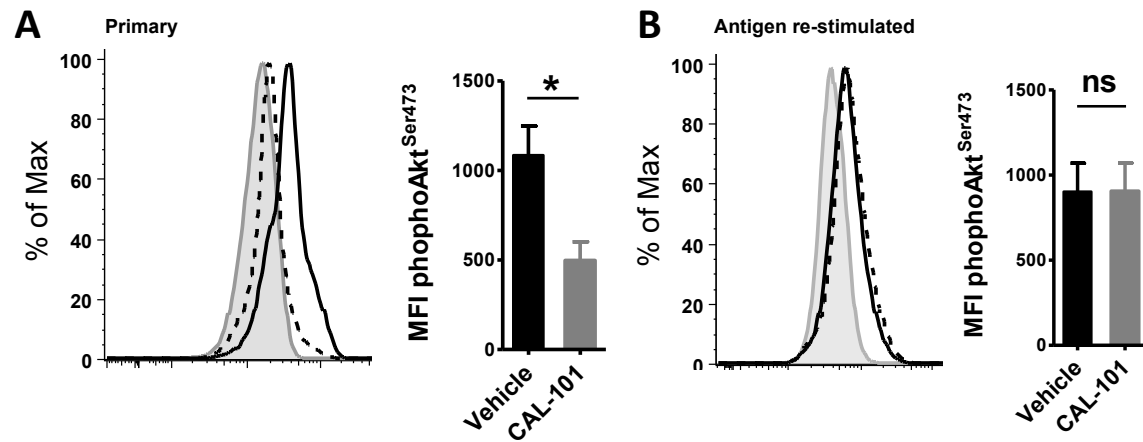

**Figure S9. Phosphorylated Akt (serine 473) is impaired in ICOS-stimulated Th17 cells inhibited of p110 $\delta$  (A) but rebounds post peptide re-stimulation (B), as shown by flow (A-B) and graphically represented as mean  $\pm$  SEM of three independent experiments. \*,  $P < 0.05$ .**

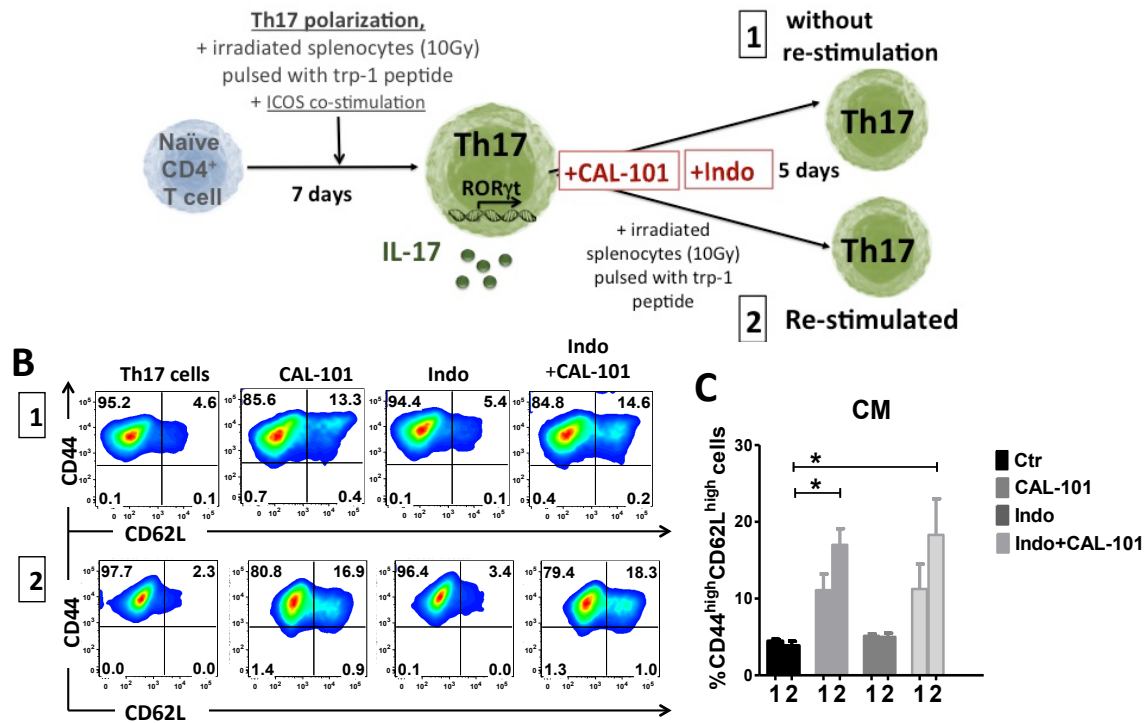

**Figure S10. Treating differentiated Th17 cells with p110 $\delta$  and  $\beta$ -catenin inhibitors rescues the expansion of the few central memory cells in the culture.** As in A, CAL-101 and/or Indo was added to ICOS-stimulated Th17 cells that were expanded for 7 days, generating of fully differentiated Th17 cells (~95% CD62L<sup>-</sup>). These drugs were added to one-week cultures either 1) with or 2) without peptide re-stimulation and expanded for an additional 5 days (12 days total). CAL-101 or CAL-101 plus Indo treatment supported the outgrowth of CD62L<sup>+</sup> cells from this population, regardless of reactivation. As shown by flow (B) and graphically (C), differentiated Th17 cultures expressed more CD62L when treated with CAL-101 or CAL-101 plus Indo. Represented as mean  $\pm$  SEM of two independent experiments. \*,  $P < 0.05$ .
